# Supplementary material
Source: PubMed Central journal article supplement (PMC8724297)
Supplement: 41422_2021_581_MOESM3_ESM.pdf [file 41422_2021_581_MOESM3_ESM.pdf]

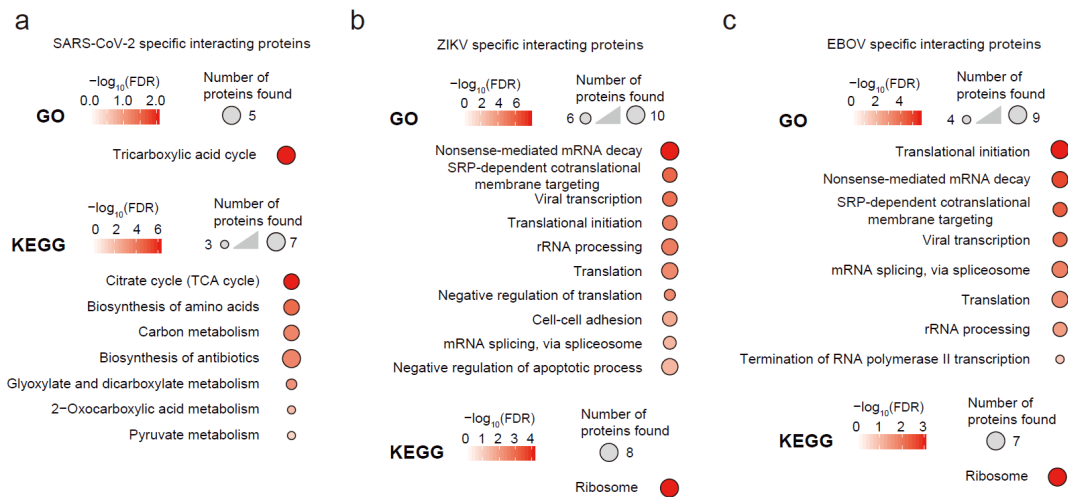

**Supplementary information, Fig. S3. Functional analysis of the vRNA-specific interacting proteins.**

**a, b, c** Gene Ontology (**GO**) and Kyoto Encyclopedia of Genes and Genomes (**KEGG**) pathway enrichment analysis of proteins specifically interacting with the SARS-CoV-2 (**a**), ZIKV (**b**) and EBOV (**c**) vRNA. For **a–c**, vRNA specific interacting proteins in the core interactomes of the three viruses were analyzed. The top-ranking significantly enriched terms are shown (FDR < 0.05).
