# Supplementary material
Source: PubMed Central journal article supplement (PMC8724297)
Supplement: 41422_2021_581_MOESM5_ESM.pdf [file 41422_2021_581_MOESM5_ESM.pdf]

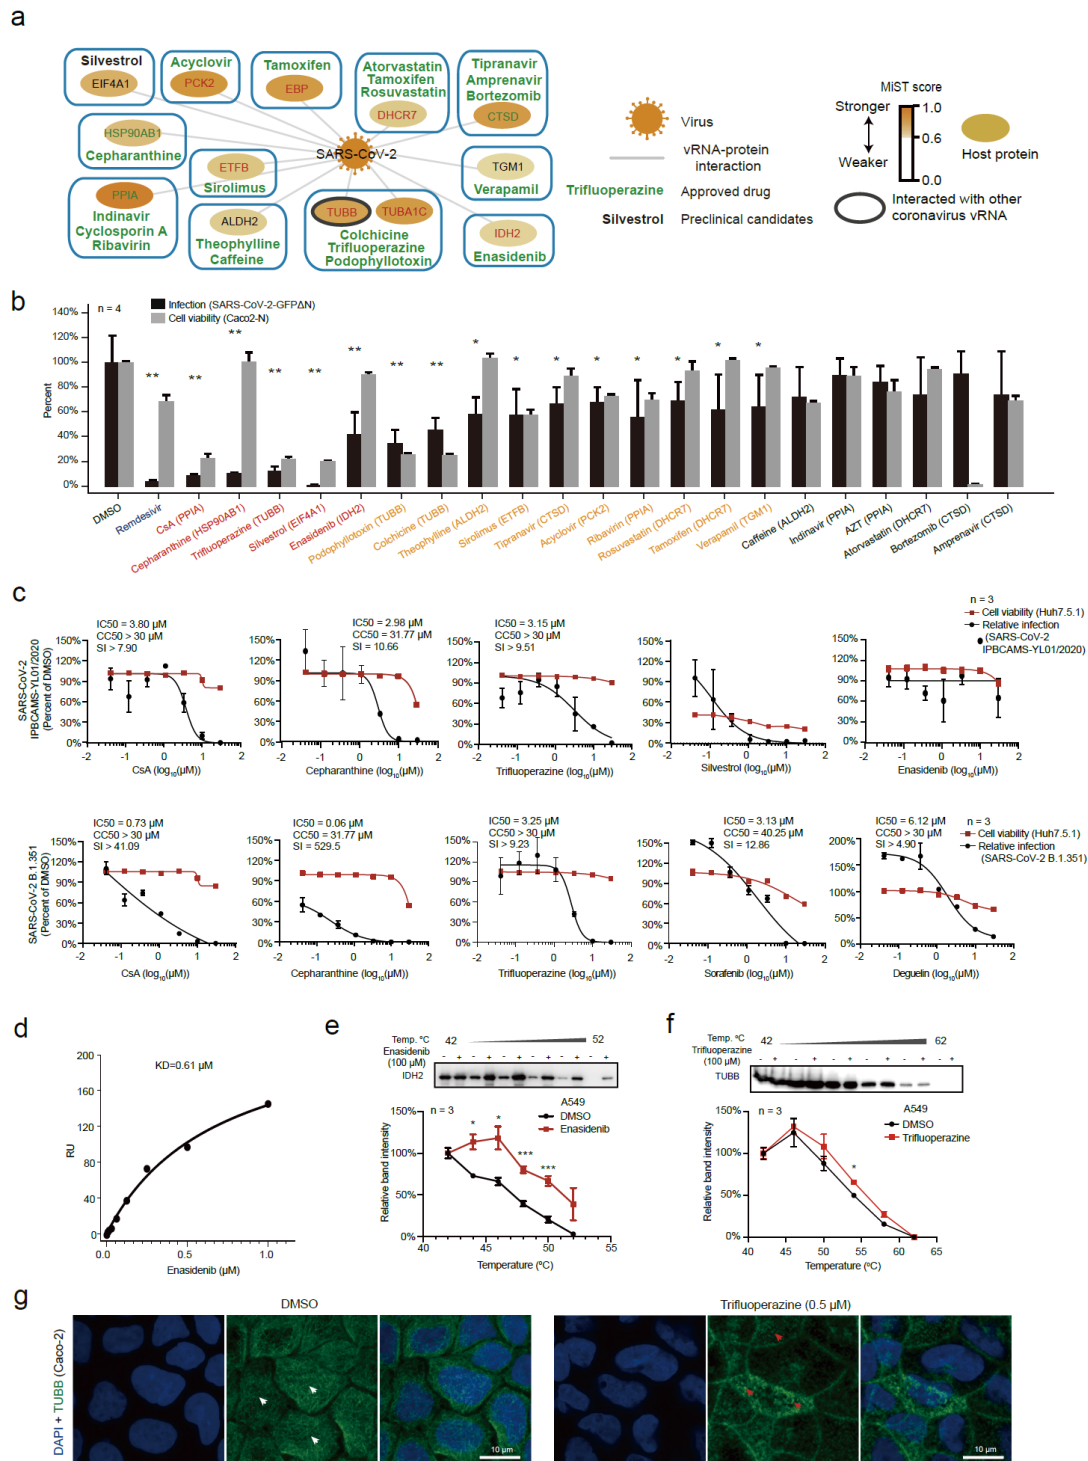

**Supplementary information, Fig. S5. Testing the antiviral activities of the indicated drugs.**

a FDA-approved (green) and clinical-trial (black) compounds modulating the SARS-CoV-2 vRNA interacting proteins are presented. Nodes are colored by the MiST scores

of SARS-CoV-2 vRNA interacting proteins, and protein names are colored by the up- (red) or down-regulation (green) upon SARS-CoV-2 infection <sup>10</sup>.

**b** SARS-CoV-2-GFP $\Delta$ N infection ratios in cells treated with the indicated drugs at a concentration of 10 $\mu$ M. Caco2-N cells were infected with SARS-CoV-2-GFP $\Delta$ N virus (Supplementary information, Fig. S4c) for 72 h with drug treatment at day 0. Black bar, infection ratios of the SARS-CoV-2-GFP $\Delta$ N. Grey bar, cell viabilities after treatment with the indicated compounds at 10 $\mu$ M. Data were normalized to DMSO treatment. Remdesivir was used as a positive control (2 $\mu$ M). Drugs selected for further validation were highlighted in red. Drugs with modest antiviral effects are highlighted in yellow. Drugs with no significant antiviral activities at a concentration of 10 $\mu$ M are in black. Data are means  $\pm$  SD.  $n = 4$  biologically independent samples. \*\*  $P < 0.01$ ; \*  $P < 0.05$ ; Two-tailed student's  $t$ -test

**c** Antiviral effects of the indicated drugs against SARS-CoV-2 (IPBCAMS-YL01/2020, first row) and its VOC (B.1.351, second row) in Huh7.5.1 cells, at different drug concentrations. Red line, cell viability; Black line, infection ratio relative to the vehicle control (DMSO) group. Data are means  $\pm$  SD.  $n = 3$  biologically independent samples. IC<sub>50</sub>, CC<sub>50</sub>, and SI values are indicated.

**d** Surface Plasmon Resonance (SPR) to test the affinity of Enasidenib to IDH2. KD, association constant measured by SPR. RU, relative response unit.

**e, f** Target engagement assay of Enasidenib (**e**) and Trifluoperazine (**f**) in A549 cells. Cellular thermal shift assay (CETSA) experiment revealed Enasidenib and Trifluoperazine target IDH2 and TUBB, respectively. Top, western blot of IDH2 or TUBB protein in cells treated with Enasidenib (**e**) or Trifluoperazine (**f**), DMSO treatment was used as control. Bottom, quantification of the western blot. \*\*\*  $P < 0.001$ ; \*\*  $P < 0.01$ ; \*  $P < 0.05$ . Two-tailed student's  $t$ -test.

**g** Immunofluorescence of TUBB containing cytoskeleton in Caco-2 cells treated with DMSO or Trifluoperazine (0.5  $\mu$ M). Green, TUBB was detected using a specific antibody. Blue, nucleus stained using DAPI. Scale bar, 10  $\mu$ m.

**Reference:**

10. Bojkova D. et al. Proteomics of SARS-CoV-2-infected host cells reveals therapy targets. *Nature* **583**, 469-472 (2020).
