# Supplementary material
Source: PubMed Central journal article supplement (PMC8724297)
Supplement: 41422_2021_581_MOESM6_ESM.pdf [file 41422_2021_581_MOESM6_ESM.pdf]

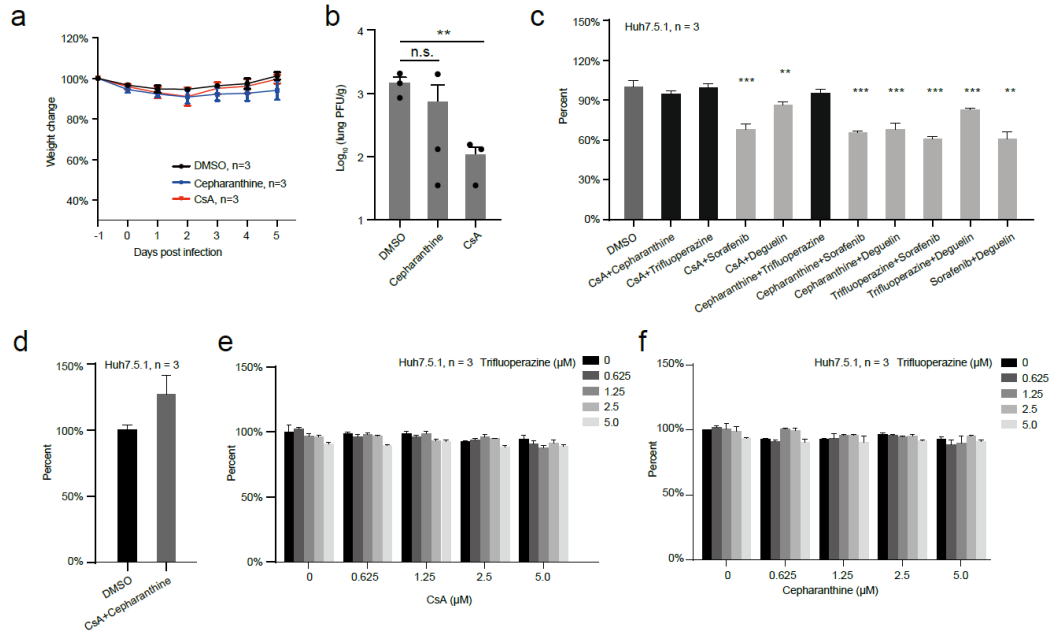

**Supplementary information, Fig. S6. Evaluation of the clinical potential and pharmacological interactions of the selected drugs.**

**a** Weight loss of hACE2 mice after infection with SARS-CoV-2. As in **Fig. 5d**, drug or vehicle was administered intranasally onto hACE2 transgenic mice. The mice were subsequently subjected to intranasal challenge with SARS-CoV-2. The body weight of vehicle- (DMSO,  $n = 3$ ), Cepharanthine- ( $n = 3$ ), and CsA-treated ( $n = 3$ ) mice were recorded for 5 days post infection.

**b** Plaque assay of viral loads in mice lung tissue. Vehicle- (DMSO,  $n = 3$ ), Cepharanthine- ( $n = 3$ ), and CsA-treated ( $n = 3$ ) mice were challenged with SARS-CoV-2. Viral loads were analyzed in the lungs of mice at 3 dpi by plaque assay. Data are means  $\pm$  SEM,  $n = 3$  independent biological samples. \*\*  $P < 0.01$ . One-tailed student's  $t$ -test.

**c** Cell viabilities after co-treatment with the indicated combined drugs. Huh7.5.1 cells were co-treated with concentration of 5  $\mu$ M for each drug. Cell viabilities were normalized to DMSO treated cells. Black bars, cell viability  $> 90\%$ . Grey bars, cell viability  $< 90\%$ . Data are means  $\pm$  SD.  $n = 3$  biologically independent samples. \*\*\*  $P < 0.001$ ; \*\*  $P < 0.01$ . Two-tailed student's  $t$ -test.

**d** The antiviral activity of a co-treatment comprising CsA and Cepharanthine. Huh7.5.1 cells were co-treated with CsA and Cepharanthine (5  $\mu$ M each) and infected with the B.1.351 strain of SARS-CoV-2 (MOI 0.05). Cells treated with the DMSO vehicle were used as control. Viral loads in culture supernatants were quantified at 48 h post infection by qPCR (represented as percentage relative to the DMSO control treatment). Data are means  $\pm$  SD.  $n = 3$  biologically independent samples.

**e, f** Cell viability upon co-treatment with CsA and Trifluoperazine (**e**), or Cepharanthine and Trifluoperazine (**f**). Huh7.5.1 cells were co-treated with different concentrations of the indicated drugs. Cell viabilities were normalized to DMSO-treated cells. Data are means  $\pm$  SD.  $n = 3$  biologically independent samples.
